# Supplementary material for: Global sensitivity analysis of a dynamic model for gene expression in Drosophila embryos
Source: PeerJ journal article supplement (doi:10.7717/peerj.1022), 2015-06-18
Supplement: McCarthy_etal_Supp_corrected.pdf [file McCarthy_etal_Supp_corrected.pdf]

Noname manuscript No.  
(will be inserted by the editor)

---

**Supplemental Information:**  
**Global sensitivity analysis of a dynamic model for  
gene expression in *Drosophila* embryos**

**Gregory D. McCarthy · Robert A.  
Drewell · Jacqueline M. Dresch**

the date of receipt and acceptance should be inserted later

---

Gregory D. McCarthy  
Hampshire College, 893 West St, Amherst, MA 01002  
E-mail: gm13@hampshire.edu

Robert A. Drewell  
Biology Department  
Clark University, Worcester, MA 01610  
E-mail: rdrewell@clarku.edu

Jacqueline M. Dresch  
Department of Mathematics  
Amherst College, Amherst, MA 01002  
E-mail: jdresch@amherst.edu

A.

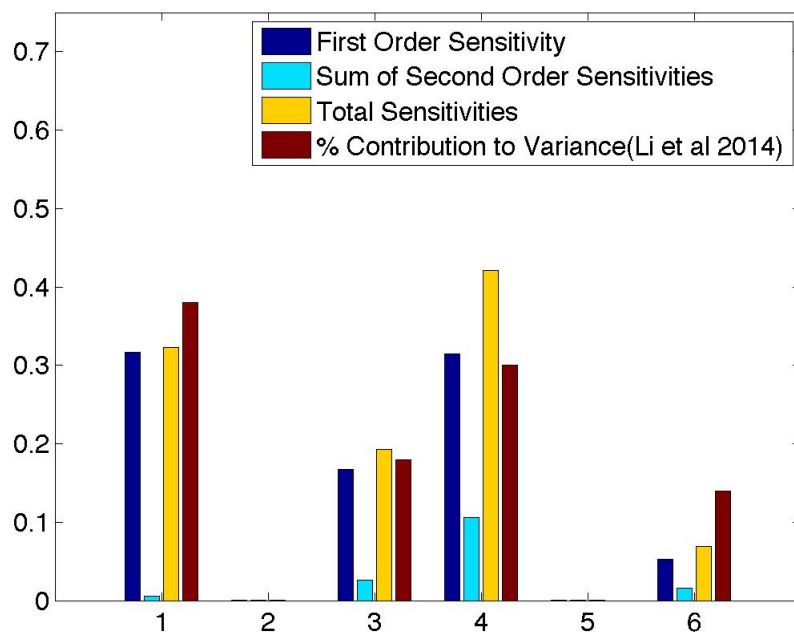

B.

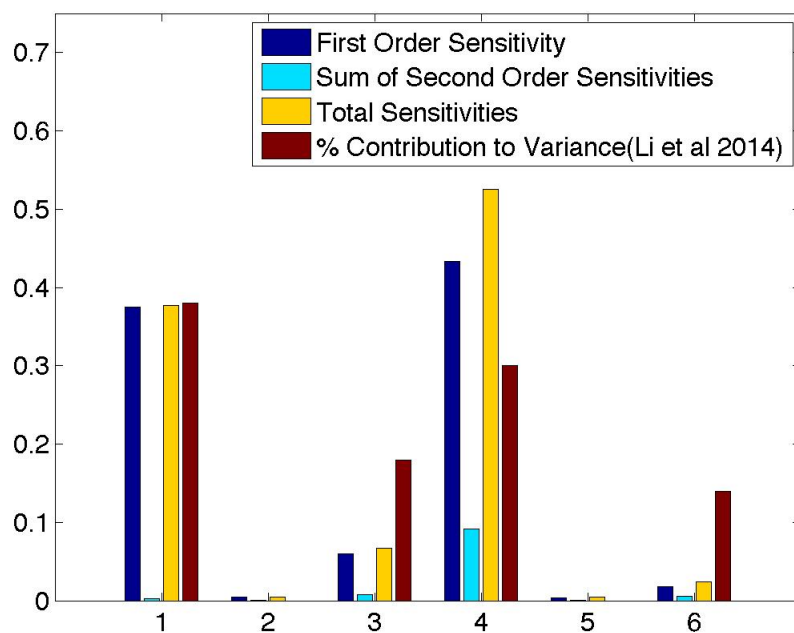

**Fig. S1. Qualitative similarities between parameter sensitivities at the most anterior nucleus and experimental measurements.** A. Ubiquitous gene with initial concentrations of 1.0; First and second-order sensitivities at the most anterior nucleus at  $t = 4$  minutes. B. Anterior maternally deposited gene; First and second-order sensitivities at the most anterior nucleus at  $t = 2$  minutes. In both panels, along the x-axis are the parameters corresponding to: 1. Transcription, 2. mRNA Diffusion, 3. mRNA Decay, 4. Translation, 5. Protein Diffusion, and 6. Protein Decay.

A.

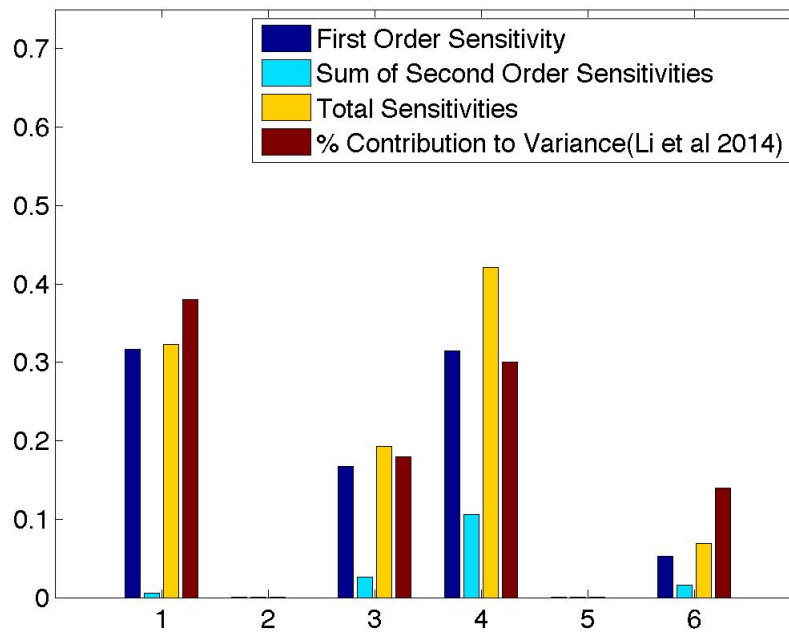

B.

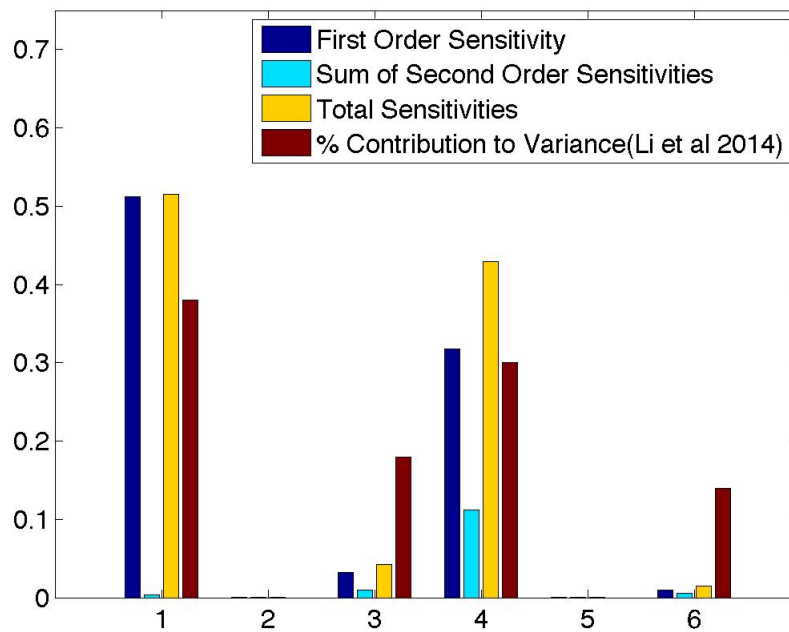

**Fig. S2. Qualitative similarities between parameter sensitivities at the most posterior nucleus and experimental measurements.** A. Ubiquitous gene with initial concentrations of 1.0; First and second-order sensitivities at the most posterior nucleus at  $t = 4$  minutes. B. Anterior maternally deposited gene; First and second-order sensitivities at the most posterior nucleus at  $t = 2$  minutes. In both panels, along the x-axis are the parameters corresponding to: 1. Transcription, 2. mRNA Diffusion, 3. mRNA Decay, 4. Translation, 5. Protein Diffusion, and 6. Protein Decay.

A.

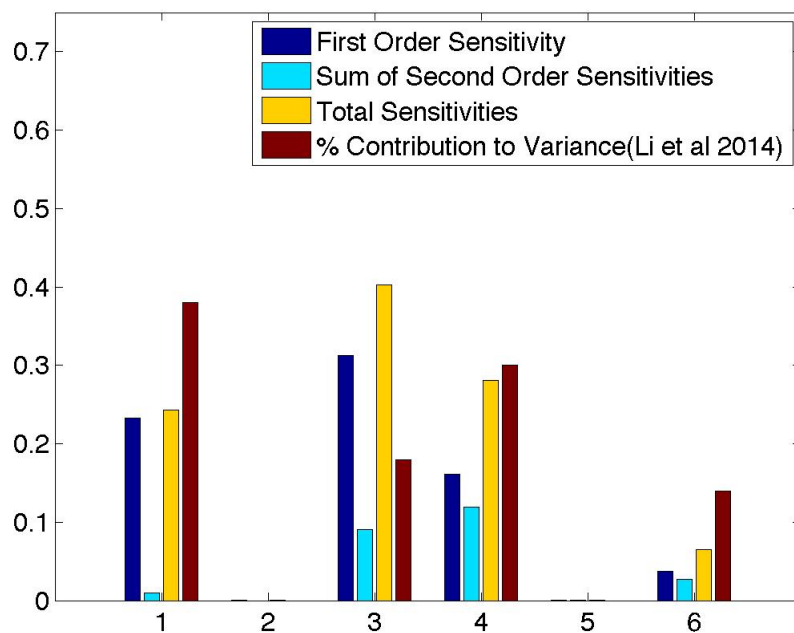

B.

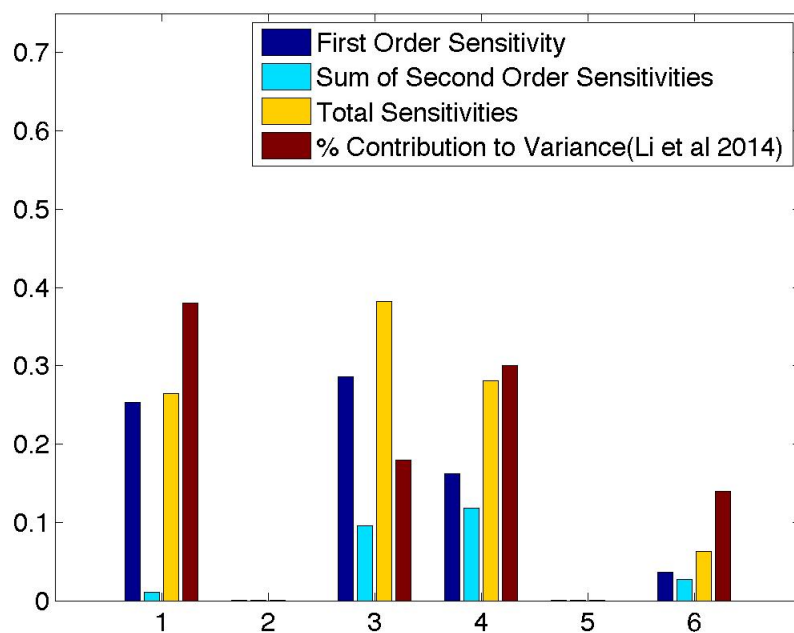

**Fig. S3. Comparison of parameter sensitivities at the most anterior nucleus to experimental measurements at a later time point.** A. Ubiquitous gene with initial concentrations of 1.0; First and second-order sensitivities at the most anterior nucleus at  $t = 10$  minutes. B. Anterior maternally deposited gene; First and second-order sensitivities at the most anterior nucleus at  $t = 10$  minutes. In both panels, along the x-axis are the parameters corresponding to: 1. Transcription, 2. mRNA Diffusion, 3. mRNA Decay, 4. Translation, 5. Protein Diffusion, and 6. Protein Decay.

A.

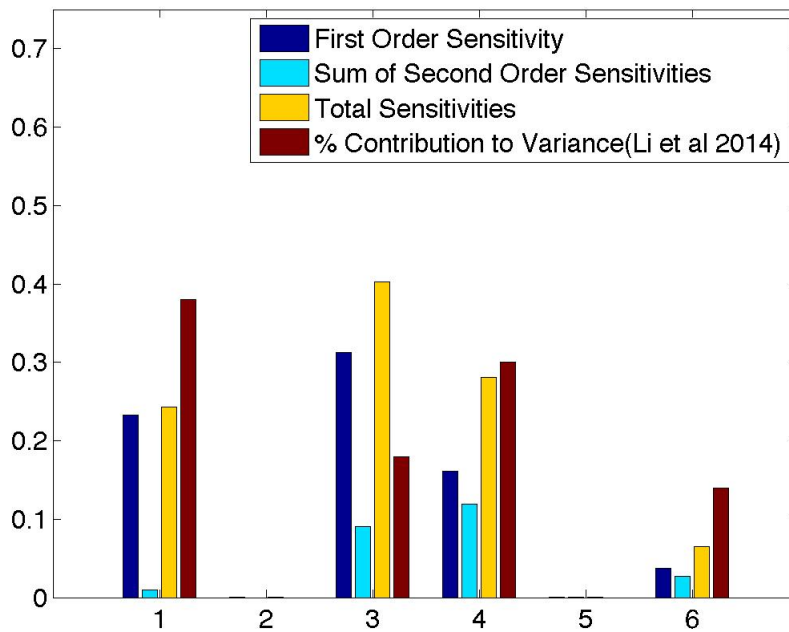

B.

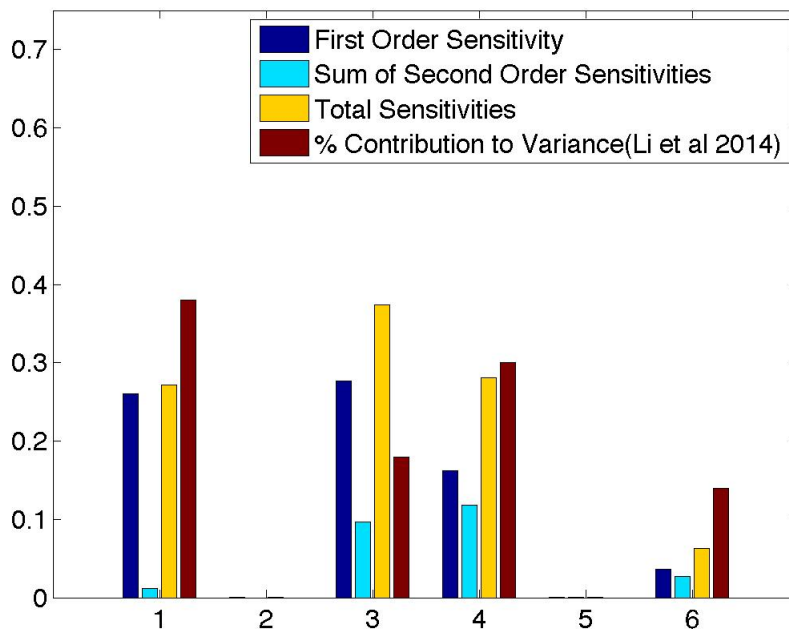

**Fig. S4. Comparison of parameter sensitivities at the most posterior nucleus to experimental measurements at a later time point.** A. Ubiquitous gene with initial concentrations of 1.0; First and second-order sensitivities at the most posterior nucleus at  $t = 10$  minutes. B. Anterior maternally deposited gene; First and second-order sensitivities at the most posterior nucleus at  $t = 10$  minutes. In both panels, along the x-axis are the parameters corresponding to: 1. Transcription, 2. mRNA Diffusion, 3. mRNA Decay, 4. Translation, 5. Protein Diffusion, and 6. Protein Decay.

A.

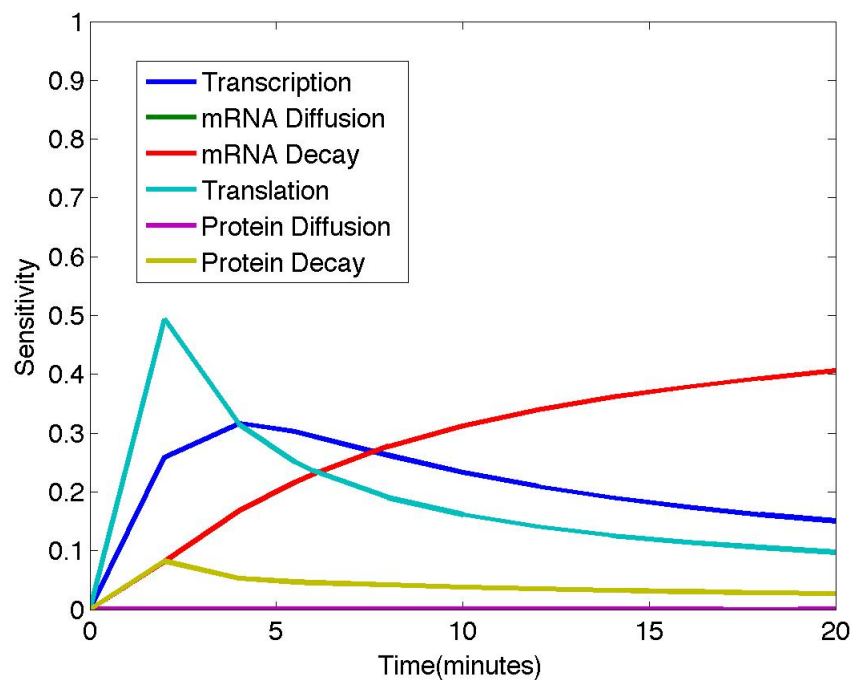

B.

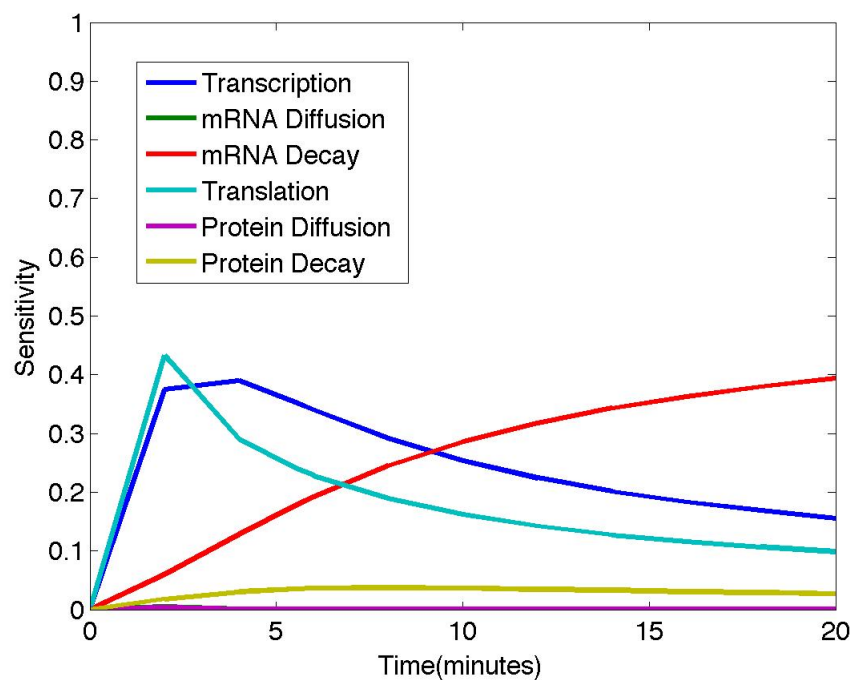

**Fig. S5. Temporal dynamics of parameter sensitivities at the most anterior nucleus.** A. First-order parameter sensitivities at the most anterior nucleus over time for a ubiquitous gene with initial concentrations of 1.0. B. First-order parameter sensitivities at the most anterior nucleus over time for an anterior maternally deposited gene

A.

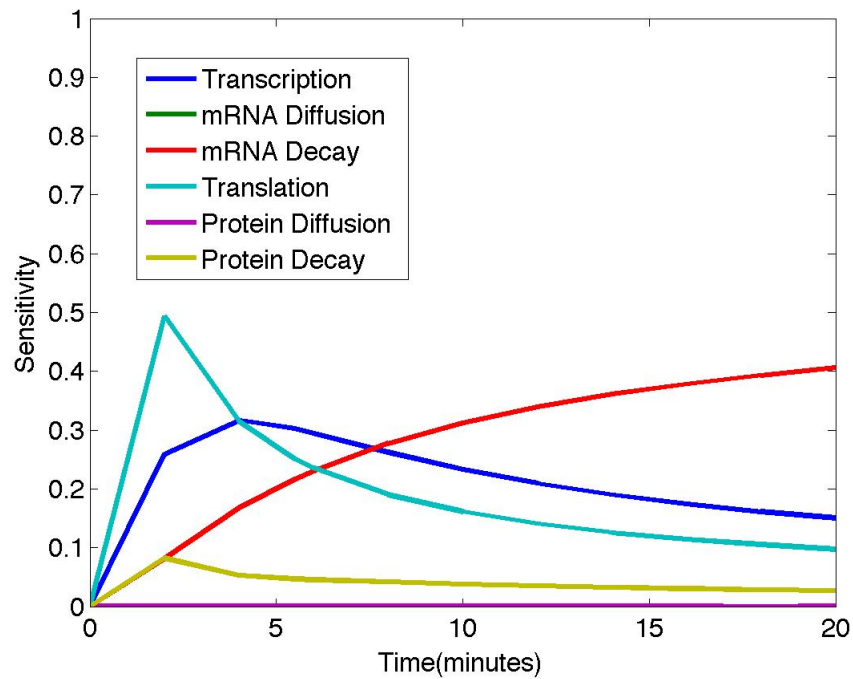

B.

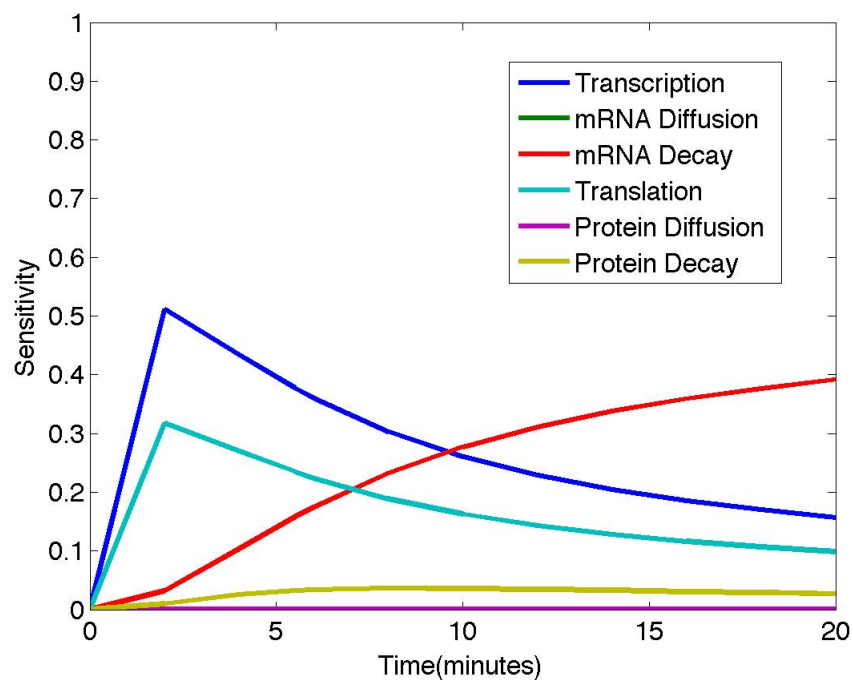

**Fig. S6. Temporal dynamics of parameter sensitivities at the most posterior nucleus.** A. First-order parameter sensitivities at the most posterior nucleus over time for a ubiquitous gene with initial concentrations of 1.0. B. First-order parameter sensitivities at the most posterior nucleus over time for an anterior maternally deposited gene
